# Supplementary material
Source: publisher figshare collection journal article supplement (https://diabetesjournals.figshare.com/ndownloader/files/24301526)
Supplement: Supplementary file 1 [file 24301526]

## Online-Only Supplemental Material

Daniel T. Dibaba, Karen C. Johnson, Anna M. Kucharska-Newton, Katie Meyer, Steven H. Zeisel, Aurelian Bidulescu

Supplemental Table S1: The odds ratio and 95 % CIs for the association of dietary choline and betaine intake per 1 standard deviation increase as a continuous variable with the risk of type 2 diabetes

|                | <i>Overall</i>     | <i>Female</i>      | <i>Male</i>        |
|----------------|--------------------|--------------------|--------------------|
| <i>Choline</i> | <i>OR (95% CI)</i> | <i>OR (95% CI)</i> | <i>OR (95% CI)</i> |
| <i>Model 1</i> | 1.06 (0.99, 1.14)  | 1.05 (0.95, 1.17)  | 1.06 (0.96, 1.17)  |
| <i>Model 2</i> | 1.00 (0.91, 1.11)  | 1.07 (0.94, 1.23)  | 0.94 (0.82, 1.08)  |
| <i>Model 3</i> | 1.00 (0.84, 1.18)  | 1.17 (0.91, 1.50)  | 0.92 (0.73, 1.15)  |
| <i>Betaine</i> |                    |                    |                    |
| <i>Model 1</i> | 0.96 (0.89, 1.03)  | 1.01 (0.91, 1.14)  | 0.91 (0.81, 1.02)  |
| <i>Model 2</i> | 1.00 (0.92, 1.10)  | 1.06 (0.93, 1.22)  | 0.94 (0.82, 1.08)  |
| <i>Model 3</i> | 0.99 (0.90, 1.09)  | 1.02 (0.88, 1.18)  | 0.96 (0.83, 1.11)  |

Abbreviations: BMI, body mass index; FBG, fasting blood glucose

Model 1 mutually adjusted for choline and betaine and further adjusted for age, sex (in overall models), race, log-BMI, education, smoking, and alcohol

Model 2 further adjusted for total calorie intake and FBG

Model 3 further adjusted for magnesium, vitamin B6, vitamin B12, methionine, animal fat, animal protein, and folate intake.

Supplemental Table S2: The odds ratio and 95 % CIs for the association of dietary choline and betaine intake with the risk of type 2 diabetes

| <i>Choline Quartiles</i>     | <i>Quartile 1</i>   | <i>Quartile 2</i> | <i>Quartile 3</i> | <i>Quartile 4</i> | <i>P-value</i> |
|------------------------------|---------------------|-------------------|-------------------|-------------------|----------------|
| <i>Model 1</i>               | 1.00 ( <i>Ref</i> ) | 1.09 (0.91, 1.30) | 1.20 (1.00, 1.44) | 1.23 (1.00, 1.51) | 0.049          |
| <i>Model 2</i>               | 1.00 ( <i>Ref</i> ) | 1.06 (0.88, 1.28) | 1.13 (0.93, 1.38) | 1.15 (1.00, 1.48) | 0.303          |
| <i>Model 3</i>               | 1.00 ( <i>Ref</i> ) | 1.07 (0.88, 1.28) | 1.16 (0.92, 1.45) | 1.22 (0.89, 1.66) | 0.260          |
| <i>Sensitivity Analysis</i>  |                     |                   |                   |                   |                |
| <i>Model 3</i>               | 1.00 ( <i>Ref</i> ) | 1.18 (0.93, 1.50) | 1.26 (0.96, 1.65) | 1.26 (0.86, 1.84) | 0.260          |
| <i>Betaine Quartiles</i>     |                     |                   |                   |                   |                |
| <i>Model 1</i>               | 1.00 ( <i>Ref</i> ) | 0.99 (0.83, 1.18) | 1.03 (0.86, 1.23) | 0.92 (0.75, 1.13) | 0.401          |
| <i>Model 2</i>               | 1.00 ( <i>Ref</i> ) | 0.98 (0.82, 1.18) | 1.08 (0.88, 1.31) | 1.02 (0.81, 1.29) | 0.812          |
| <i>Model 3</i>               | 1.00 ( <i>Ref</i> ) | 0.96 (0.80, 1.16) | 1.04 (0.84, 1.27) | 0.99 (0.77, 1.26) | 0.930          |
| <i>Sensitivity Analysis*</i> |                     |                   |                   |                   |                |
| <i>Model 3</i>               | 1.00 ( <i>Ref</i> ) | 0.95 (0.76, 1.19) | 0.95 (0.75, 1.22) | 1.04 (0.78, 1.38) | 0.930          |

Abbreviations: BMI, body mass index; FBG, fasting blood glucose; Log, logarithm transformed

*P-value* is p for trend computed by modeling the quartile median of each nutrient as the predictor variable

Model 1 mutually adjusted for choline and betaine and further adjusted for age, sex, race, log-BMI, education, smoking, and alcohol

Model 2 further adjusted for total calorie intake and baseline FBG

Model 3 further adjusted for magnesium, vitamin B6, vitamin B12, methionine, animal fat, and folate intake

\*In sensitivity analyses we limited estimates to participants without insulin resistance at baseline.

Supplemental Table S3: The odds ratio and 95 % CIs for the association of dietary choline and betaine intake with the risk of type 2 diabetes stratified by gender

| <i>Female</i>            |                     |                   |                   |                   |                |
|--------------------------|---------------------|-------------------|-------------------|-------------------|----------------|
| <i>Choline Quartiles</i> | Quartile 1          | Quartile 2        | Quartile 3        | Quartile 4        | <i>P-value</i> |
| <i>Model 1</i>           | 1.00 ( <i>Ref</i> ) | 1.19 (0.94, 1.50) | 1.27 (0.99, 1.62) | 1.36 (1.02, 1.80) | 0.122          |
| <i>Model 2</i>           | 1.00 ( <i>Ref</i> ) | 1.27 (0.98, 1.64) | 1.34 (1.01, 1.77) | 1.56 (1.09, 2.24) | 0.041          |
| <i>Model 3</i>           | 1.00 ( <i>Ref</i> ) | 1.36 (1.03, 1.79) | 1.48 (1.06, 2.06) | 1.87 (1.17, 3.00) | 0.027          |
| <i>Betaine Quartiles</i> |                     |                   |                   |                   |                |
| <i>Model 1</i>           | 1.00 ( <i>Ref</i> ) | 1.11 (0.88, 1.41) | 1.29 (1.02, 1.65) | 1.17 (0.88, 1.56) | 0.502          |
| <i>Model 2</i>           | 1.00 ( <i>Ref</i> ) | 1.14 (0.88, 1.47) | 1.47 (1.12, 1.92) | 1.35 (0.97, 1.88) | 0.091          |
| <i>Model 3</i>           | 1.00 ( <i>Ref</i> ) | 1.11 (0.85, 1.44) | 1.39 (1.05, 1.84) | 1.21 (0.86, 1.72) | 0.282          |
| <i>Male</i>              |                     |                   |                   |                   |                |
| <i>Choline Quartiles</i> | Quartile 1          | Quartile 2        | Quartile 3        | Quartile 4        | <i>P-value</i> |
| <i>Model 1</i>           | 1.00 ( <i>Ref</i> ) | 1.00 (0.77, 1.29) | 1.14 (0.88, 1.47) | 1.15 (0.87, 1.53) | 0.182          |
| <i>Model 2</i>           | 1.00 ( <i>Ref</i> ) | 0.90 (0.68, 1.18) | 0.98 (0.73, 1.30) | 0.87 (0.61, 1.24) | 0.662          |
| <i>Model 3</i>           | 1.00 ( <i>Ref</i> ) | 0.89 (0.67, 1.18) | 0.97 (0.71, 1.33) | 0.89 (0.58, 1.37) | 0.849          |
| <i>Betaine Quartiles</i> |                     |                   |                   |                   |                |
| <i>Model 1</i>           | 1.00 ( <i>Ref</i> ) | 0.92 (0.72, 1.17) | 0.85 (0.66, 1.10) | 0.78 (0.59, 1.03) | 0.054          |
| <i>Model 2</i>           | 1.00 ( <i>Ref</i> ) | 0.87 (0.66, 1.13) | 0.80 (0.61, 1.06) | 0.79 (0.57, 1.09) | 0.192          |
| <i>Model 3</i>           | 1.00 ( <i>Ref</i> ) | 0.86 (0.66, 1.12) | 0.79 (0.59, 1.05) | 0.81 (0.58, 1.13) | 0.271          |

Abbreviations: BMI, body mass index; FBG, fasting blood glucose; Log, logarithm transformed

*P-value* is p for trend computed by modeling the quartile median of each nutrient as the predictor variable

Model 1 mutually adjusted for choline and betaine and further adjusted for age, race, log-BMI, education, smoking, and alcohol

Model 2 further adjusted for total calorie intake and baseline FBG

Model 3 further adjusted for magnesium, vitamin B6, vitamin B12, methionine, animal fat, and folate intake
